# Supplementary material
Source: PubMed Central journal article supplement (PMC7467560)
Supplement: am0c09451_si_001.pdf [file am0c09451_si_001.pdf]

## Supporting Information

# **Flexible C<sub>6</sub>BN Monolayers As Promising Anode Materials for High-Performance K-Ion Batteries**

Pan Xiang<sup>1,2</sup>, Sitansh Sharma<sup>2,\*</sup>, Zhiming M. Wang<sup>1</sup>, Jiang Wu<sup>1,\*</sup>, Udo Schwingenschlög<sup>1,2,\*</sup>

<sup>1</sup> Institute of Fundamental and Frontier Sciences, University of Electronic Science and Technology of China, Chengdu 610054, P. R. China

<sup>2</sup> Physical Sciences and Engineering Division, King Abdullah University of Science and Technology, Thuwal, 23955-6900, Saudi Arabia

---

\* sitansh.sharma@kaust.edu.sa; jiangwu@uestc.edu.cn; udo.schwingenschlogl@kaust.edu.sa

Table S1. Structural details of the optimized C<sub>6</sub>BN nanotubes.

|                       | (N, M)  | Diameter<br>(Å) | Number of<br>formula units | Total energy<br>(Ha) | <i>c</i> lattice<br>parameter (Å) |
|-----------------------|---------|-----------------|----------------------------|----------------------|-----------------------------------|
| C <sub>6</sub> BN-I   | (3, 0)  | 4.98            | 6                          | -1849.36             | 8.598                             |
|                       | (6, 0)  | 9.69            | 12                         | -3699.49             | 8.617                             |
|                       | (9, 0)  | 14.31           | 18                         | -5549.44             | 8.622                             |
|                       | (12, 0) | 19.13           | 24                         | -7399.34             | 8.624                             |
|                       | (15, 0) | 23.82           | 30                         | -9249.22             | 8.626                             |
|                       | (18, 0) | 28.62           | 36                         | -11099.10            | 8.627                             |
| C <sub>6</sub> BN-II  | (3, 0)  | 5.07            | 6                          | -1849.34             | 8.607                             |
|                       | (6, 0)  | 9.74            | 12                         | -3699.44             | 8.630                             |
|                       | (9, 0)  | 14.46           | 18                         | -5549.36             | 8.635                             |
|                       | (12, 0) | 19.13           | 24                         | -7399.24             | 8.637                             |
|                       | (15, 0) | 23.89           | 30                         | -9249.10             | 8.639                             |
|                       | (18, 0) | 28.64           | 36                         | -11098.96            | 8.639                             |
| C <sub>6</sub> BN-III | (3, 0)  | 4.92            | 6                          | -1849.56             | 8.611                             |
|                       | (6, 0)  | 9.60            | 12                         | -3699.94             | 8.624                             |
|                       | (9, 0)  | 14.27           | 18                         | -5550.14             | 8.624                             |
|                       | (12, 0) | 19.05           | 24                         | -7400.29             | 8.625                             |
|                       | (15, 0) | 23.76           | 30                         | -9250.42             | 8.625                             |
|                       | (18, 0) | 28.50           | 36                         | -11100.54            | 8.623                             |

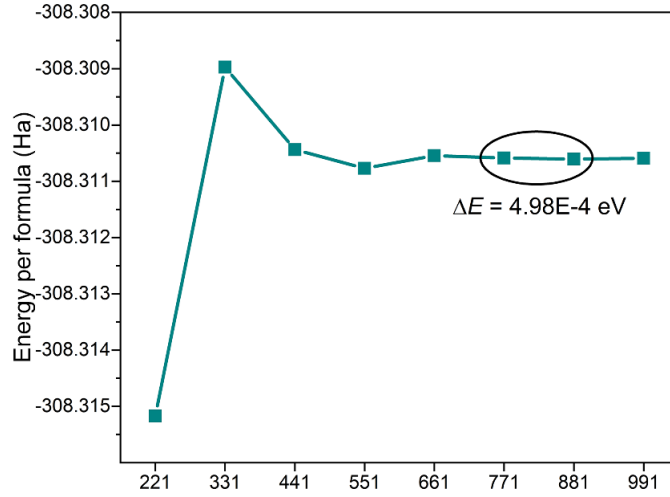

Figure S1. Total energy of C<sub>6</sub>BN-I for different k-meshes.

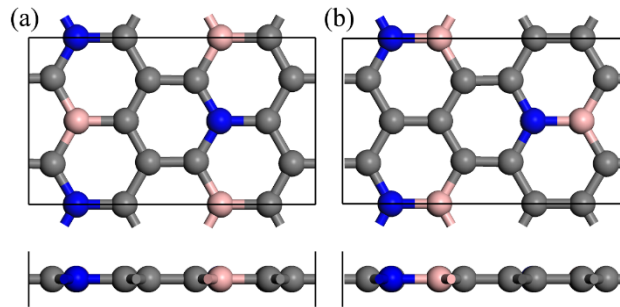

Figure S2. Top and side views of the unit cells of (a) C<sub>6</sub>BN-II and (b) C<sub>6</sub>BN-III.

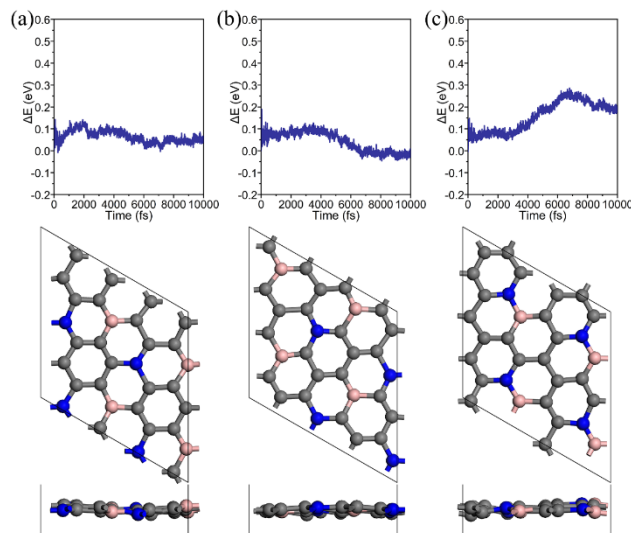

Figure S3. Total potential energy in  $2 \times 2$  (a) C<sub>6</sub>BN-I, (b) C<sub>6</sub>BN-II, and (c) C<sub>6</sub>BN-III at 1200 K and corresponding structure after the ab initio molecular dynamics simulation.

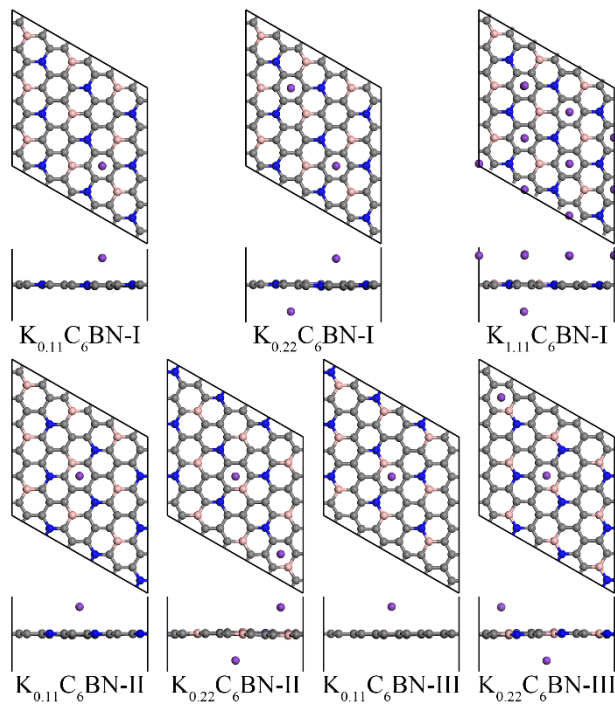

Figure S4. Intermediate structures during potassiation.

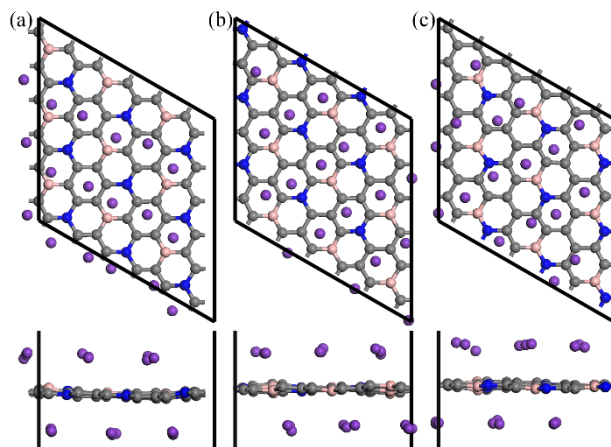

Figure S5. Maximally potassiated (a)  $C_6BN-I$ , (b)  $C_6BN-II$ , and (c)  $C_6BN-III$  after ab-initio molecular dynamics simulations at 300 K.
